# Supplementary material
Source: publisher site journal article supplement (https://www.dovepress.com/article/supplementary_file/590361/supplementary%20data_1.docx)
Supplement: Supplementary file 1 [file supplementary%20data_1.docx]

| **Supplementary Table 1 Analysis of general demographic characteristics in the Tibetan population** | | | | | |
| --- | --- | --- | --- | --- | --- |
| Tibetan | Total n(case) | Case group n(%) n=164 | Control group n(%) n=235 | χ² | P-value |
| Gender |  |  |  | 7.544 | 0.008* |
| Male | 179 | 87(53.0) | 92(39.1) |  |  |
| Female | 220 | 160(53.9) | 136(46.6) |  |  |
| Age |  |  |  | 14.114 | <0.001* |
| ≤60 | 241 | 81(49.4) | 160(68.1) |  |  |
| >60 | 158 | 83(50.6) | 75(31.9) |  |  |
| BMI |  |  |  | 0.745 | 0.689 |
| <18.5 | 14 | 5(3.1) | 9(3.8) |  |  |
| 18.5-23.9 | 168 | 73(44.5) | 95(40.5) |  |  |
| ≥24.0 | 217 | 86(52.4) | 131(55.7) |  |  |
| Education level |  |  |  | 0.296 | 0.862 |
| Primary and below | 238 | 100(61.3) | 138(58.7) |  |  |
| Secondary | 71 | 29(17.2) | 42(17.9) |  |  |
| Tertiary and above | 90 | 35(21.5) | 55(23.4) |  |  |
| Marital status |  |  |  | 4.208 | 0.252 |
| Married | 364 | 146(89.0) | 218(92.8) |  |  |
| Unmarried | 3 | 2(1.2) | 1(0.4) |  |  |
| Widowed | 30 | 16(9.8) | 14(6.0) |  |  |
| Divorced | 2 | 0(0.0) | 2(0.9) |  |  |
| Smoking |  |  |  | 11.625 | <0.001* |
| Yes | 103 | 57(34.8) | 46(19.6) |  |  |
| No | 296 | 107(65.2) | 189(80.4) |  |  |
| Drinking |  |  |  | 1.525 | 0.255 |
| Yes | 60 | 29(17.7) | 31(13.2) |  |  |
| No | 339 | 135(82.3) | 204(86.8) |  |  |
| **Note:** *Statistically significant parameters. | | | | | |

| **Supplementary Table 2 Analysis of General Demographic Characteristics in the Han Population** | | | | | |
| --- | --- | --- | --- | --- | --- |
| Han | Total n(case) | Case group n(%) n=439 | Control group n(%) n=438 | χ² | P-value |
| Gender |  |  |  | 62.970 | <0.001* |
| Male | 442 | 280 (63.5) | 162 (37.0) |  |  |
| Female | 435 | 159 (36.2) | 276 (63.0) |  |  |
| Age |  |  |  | 77.012 | <0.001* |
| ≤60 | 502 | 187 (42.6) | 315 (71.9) |  |  |
| >60 | 375 | 252 (57.4) | 123 (28.1) |  |  |
| BMI |  |  |  | 2.686 | 0.266 |
| <18.5 | 27 | 10 (2.3) | 17 (3.9) |  |  |
| 18.5-23.9 | 366 | 178 (40.6) | 188 (42.9) |  |  |
| ≥24.0 | 483 | 251 (57.1) | 233 (53.2) |  |  |
| Education level |  |  |  | 3.727 | 0.060 |
| Primary and below | 348 | 194 (44.1) | 154 (35.2) |  |  |
| Secondary | 239 | 128 (29.2) | 111 (25.3) |  |  |
| Tertiary and above | 290 | 117 (26.7) | 173 (39.5) |  |  |
| Marital status |  |  |  | 0.235 | 0.955 |
| Married | 829 | 416 (94.8) | 413 (94.3) |  |  |
| Unmarried | 4 | 2 (0.5) | 2 (0.5) |  |  |
| Widowed | 39 | 19 (4.2) | 20 (4.5) |  |  |
| Divorced | 5 | 2 (0.5) | 3 (0.7) |  |  |
| Smoking |  |  |  | 3.930 | 0.047* |
| Yes | 596 | 154 (35.1) | 127 (29.0) |  |  |
| No | 281 | 285 (64.9) | 311 (71.0) |  |  |
| Drinking |  |  |  | 0.572 | 0.501 |
| Yes | 126 | 67 (15.3) | 59 (13.5) |  |  |
| No | 751 | 372 (84.7) | 379 (86.5) |  |  |
| **Note:** *Statistically significant parameters. | | | | | |

| **Supplementary Table 3 Association Analysis of rs135538C>G Polymorphism with COPD Susceptibility in Tibetan and Han Populations** | | | | | | | |
| --- | --- | --- | --- | --- | --- | --- | --- |
| Ethnic group | Model | rs135538C>G | Case group n(%) | Control group n(%) | Adjusted OR (95%CI) | Pa | AIC |
| Tibetan (n=399) | Additive | CC | 40 (24.4) | 74 (31.5) | 1.000 (ref.) |  |  |
|  |  | GC | 97 (59.1) | 117 (49.8) | 0.652 (0.408–1.043) | 0.074 |  |
|  |  | GG | 27 (16.5) | 44 (18.7) | 0.881 (0.477–1.628) | 0.686 | 536.853 |
|  | Dominant | CC | 40 (24.4) | 74 (31.5) |  |  |  |
|  |  | GG+GC | 124 (75.6) | 161 (68.5) | 1.425 (0.908–2.235) | 0.123 | 538.018 |
|  | Recessive | CC+GC | 137 (83.5) | 191 (81.3) |  |  |  |
|  |  | GG | 27 (16.5) | 44 (18.7) | 1.169 (0.690–1.980) | 0.562 | 540.09 |
| Han (n=877) | Additive | CC | 145 (33.0) | 146 (33.3) | 1.000 (ref.) |  |  |
|  |  | GC | 208 (47.4) | 202 (46.2) | 0.962 (0.662–1.399) | 0.840 |  |
|  |  | GG | 86 (19.6) | 90 (20.5) | 0.928 (0.652–1.321) | 0.678 | 1215.598 |
|  | Dominant | CC | 145 (33.0) | 146 (33.3) |  |  |  |
|  |  | GG+GC | 294 (67.0) | 292 (66.7) | 1.014 (0.765–1.343) | 0.924 | 1215.770 |
|  | Recessive | CC+GC | 353 (80.4) | 348 (79.5) |  |  |  |
|  |  | GG | 86 (19.6) | 90 (20.5) | 1.062 (0.763–1.477) | 0.723 | 1215.654 |
| **Note：**aAdjusted for gender, age, BMI, educational level, marital status, smoking, and alcohol consumption.  **Abbreviations:** OR, dominance ratio; CI, confidence interval; AIC, red pool information criterion. | | | | | | | |

| **Supplementary Table 4 Association Analysis of rs135539A>C Polymorphism with COPD Susceptibility in Tibetan and Han Populations** | | | | | | | |
| --- | --- | --- | --- | --- | --- | --- | --- |
| Ethnic group | Model | rs135539A>C | Case group n(%) | Control group n(%) | Adjusted OR (95%CI) | P a | AIC |
| Tibetan (n=399) | Additive | AA | 28 (17.1) | 63 (26.8) | 1.000 (ref.) |  |  |
|  |  | CA | 92 (56.1) | 112 (47.7) | 1.650 (0.914–2.980) | 0.097 |  |
|  |  | CC | 44 (26.8) | 60 (25.5) | 0.893 (0.554–1.438) | 0.641 | 534.881 |
|  | Dominant | AA | 28 (17.1) | 63 (26.8) |  |  |  |
|  |  | CC+CA | 136 (82.9) | 172 (73.2) | 1.779 (1.080–2.930) | 0.024* | 535.099 |
|  | Recessive | AA+CA | 120 (73.2) | 175 (74.5) |  |  |  |
|  |  | CC | 44 (26.8) | 60 (25.5) | 1.034 (0.825–1.297) | 0.771 | 540.346 |
| Han (n=877) | Additive | AA | 92 (21.0) | 99 (22.6) | 1.000 (ref.) |  |  |
|  |  | CA | 217 (49.4) | 212 (48.4) | 1.102 (0.757–1.602) | 0.613 |  |
|  |  | CC | 130 (29.6) | 127 (29.0) | 1.000 (0.724–1.362) | 1.000 | 1215.598 |
|  | Dominant | AA | 92 (21.0) | 99 (22.6) |  |  |  |
|  |  | CC+CA | 347 (79.0) | 339 (77.4) | 0.953 (0.812–1.119) | 0.555 | 1215.430 |
|  | Recessive | AA+CA | 309 (70.4) | 311 (71.0) |  |  |  |
|  |  | CC | 130 (29.6) | 127 (29.0) | 0.971 (0.726–1.298) | 0.841 | 1215.739 |
| **Notes：***Statistically significant parameters.aAdjusted for gender, age, BMI, educational level, marital status, smoking, and alcohol consumption.  **Abbreviations:** OR, dominance ratio; CI, confidence interval; AIC, red pool information criterion. | | | | | | | |

| **Supplementary Table 5 Association Analysis of rs135549T>C Polymorphism with COPD Susceptibility in Tibetan and Han Populations** | | | | | | | |
| --- | --- | --- | --- | --- | --- | --- | --- |
| Ethnic group | Model | rs135549T>C | Case group n(%) | Control group n(%) | Adjusted OR (95%CI) | Pa | AIC |
| Tibetan (n=399) | Additive | TT | 102 (62.2) | 144 (61.3) | 1.000 (ref.) |  |  |
|  |  | CT | 55 (33.5) | 78 (33.2) | 0.760 (0.293–1.972) | 0.573 |  |
|  |  | CC | 7 (4.3) | 13 (5.5) | 0.764 (0.286–2.038) | 0.590 | 540.100 |
|  | Dominant | TT | 102 (62.2) | 144 (61.3) |  |  |  |
|  |  | CC+CT | 62 (37.8) | 91 (38.7) | 0.962 (0.638–1.450) | 0.853 | 540.395 |
|  | Recessive | TT+CT | 157 (95.7) | 222 (94.5) |  |  |  |
|  |  | CC | 7 (4.3) | 13 (5.5) | 1.313 (0.512–3.367) | 0.570 | 540.100 |
| Han (n=877) | Additive | TT | 285 (64.9) | 250 (57.1) | 1.000 (ref.) |  |  |
|  |  | CT | 136 (31.0) | 162 (37.0) | 0.607 (0.325–1.134) | 0.118 |  |
|  |  | CC | 18 (4.1) | 26 (5.9) | 0.825 (0.434–1.568) | 0.557 | 1209.755 |
|  | Dominant | TT | 285 (64.9) | 250 (57.1) |  |  |  |
|  |  | CC+CT | 154 (35.1) | 188 (42.9) | 0.719 (0.547–0.944) | 0.017* | 1210.103 |
|  | Recessive | TT+CT | 421 (95.9) | 412 (94.1) |  |  |  |
|  |  | CC | 18 (4.1) | 26 (5.9) | 1.476 (0.797–2.733) | 0.216 | 1214.220 |
| **Notes：***Statistically significant parameters.aAdjusted for gender, age, BMI, educational level, marital status, smoking, and alcohol consumption.  **Abbreviations:** OR, dominance ratio; CI, confidence interval; AIC, red pool information criterion. | | | | | | | |

| **Supplementary Table 6 Association Analysis of rs4253758T>C Polymorphism with COPD Susceptibility in Tibetan and Han Populations** | | | | | | | |
| --- | --- | --- | --- | --- | --- | --- | --- |
| Ethnic group | Model | rs4253758T>C | Case group n(%) | Control group n(%) | Adjusted OR (95%CI) | Pₐ | AIC |
| Tibetan (n=399) | Additive | TT | 82(50.0) | 117(49.8) | 1.000(ref.) |  |  |
|  |  | TC | 70(42.7) | 101(43.0) | 1.007(0.457-2.222) | 0.986 |  |
|  |  | CC | 12(7.3) | 17(7.2) | 1.018(0.458-2.265) | 0.964 | 540.426 |
|  | Dominant | TT | 82(50.0) | 117(49.8) |  |  |  |
|  |  | CC+TC | 82(50.0) | 118(50.2) | 0.992(0.665-1.477) | 0.967 | 540.428 |
|  | Recessive | TT+TC | 152(92.7) | 218(92.8) |  |  |  |
|  |  | CC | 12(7.3) | 17(7.2) | 0.988(0.459-2.128) | 0.975 | 540.429 |
| Han (n=877) | Additive | TT | 210(47.8) | 217(49.5) | 1.000(ref.) |  |  |
|  |  | TC | 179(40.8) | 191(43.7) | 1.722(1.504-2.813) | 0.030* |  |
|  |  | CC | 50(11.4) | 30(6.8) | 1.778(1.083-2.922) | 0.023* | 1214.220 |
|  | Dominant | TT | 210(47.8) | 217(49.5) |  |  |  |
|  |  | CC+TC | 229(52.2) | 221(50.5) | 1.071(0.822-1.395) | 0.613 | 1210.223 |
|  | Recessive | CC | 50(11.4) | 30(6.8) |  |  |  |
|  |  | TT+TC | 389(88.6) | 408(93.2) | 0.572(0.356-0.918) | 0.021* | 1210.274 |
| **Notes：***Statistically significant parameters.aAdjusted for gender, age, BMI, educational level, marital status, smoking, and alcohol consumption.  **Abbreviations:** OR, dominance ratio; CI, confidence interval; AIC, red pool information criterion. | | | | | | | |
